# Supplementary material for: Semi-Preparative Separation, Absolute Configuration, Stereochemical Stability and Effects on Human Neuronal Cells of MDPV Enantiomers
Source: MDPI journal article supplement (doi:10.3390/molecules28052121), 2023-02-24
Supplement: s1 [file s1]

# Supplementary Material

Article

## Semi-Preparative Separation, Absolute Configuration, Stereochemical Stability and Effects on Human Neuronal Cells of MDPV Enantiomers

Ana Sofia Almeida <sup>1,2,3,4</sup>, Bárbara Silva <sup>3,4</sup>, João Pedro Silva <sup>3,4</sup>, José Augusto Pereira <sup>2,5</sup>, Fernando Remião <sup>3,4,\*</sup> and Carla Fernandes <sup>1,2,\*</sup>

<sup>1</sup> Laboratório de Química Orgânica e Farmacêutica, Departamento de Ciências Químicas, Faculdade de Farmácia, Universidade do Porto, Rua Jorge Viterbo Ferreira n° 228, 4050-313 Porto, Portugal

<sup>2</sup> Centro Interdisciplinar de Investigação Marinha e Ambiental (CIIMAR), Universidade do Porto, Terminal de Cruzeiros do Porto de Leixões, Avenida General Norton de Matos, s/n, 4450-208 Matosinhos, Portugal

<sup>3</sup> UCIBIO—Applied Molecular Biosciences Unit, REQUIMTE, Laboratory of Toxicology, Department of Biological Sciences, Faculty of Pharmacy, University of Porto, Rua de Jorge Viterbo Ferreira n° 228, 4050-313 Porto, Portugal

<sup>4</sup> Associate Laboratory i4HB—Institute for Health and Bioeconomy, Faculty of Pharmacy, University of Porto, Rua Jorge Viterbo Ferreira n° 228, 4050-313 Porto, Portugal

<sup>5</sup> ICBAS, Instituto de Ciências Biomédicas de Abel Salazar, Universidade do Porto, Rua Jorge Viterbo Ferreira n° 228, 4050-313 Porto, Portugal

\* Correspondence: remiao@ff.up.pt (F.R.); cfernandes@ff.up.pt (C.F.)

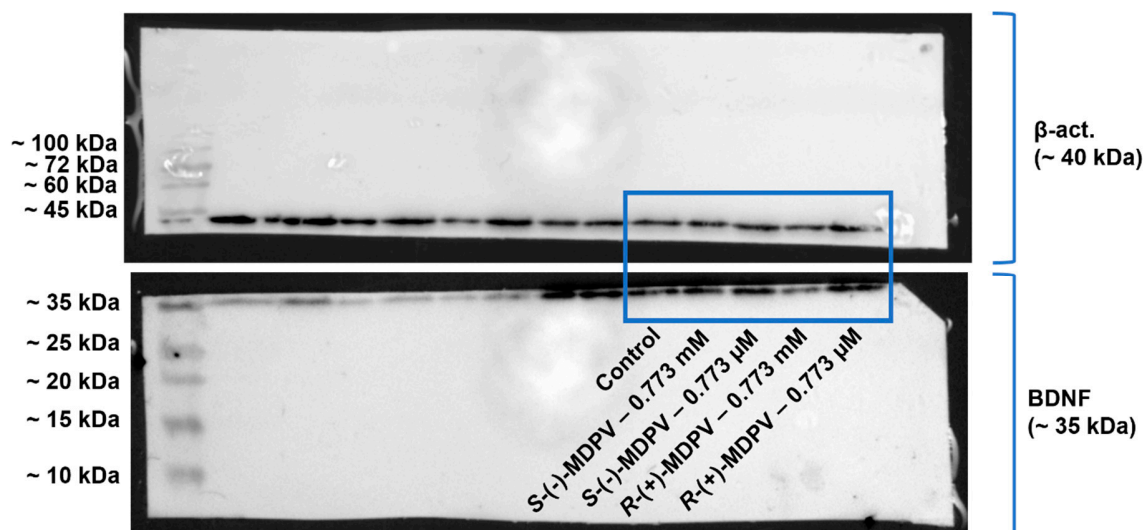

Figure S1. Whole western blot with molecular weight markers for the results of BDNF (Figure 9A).

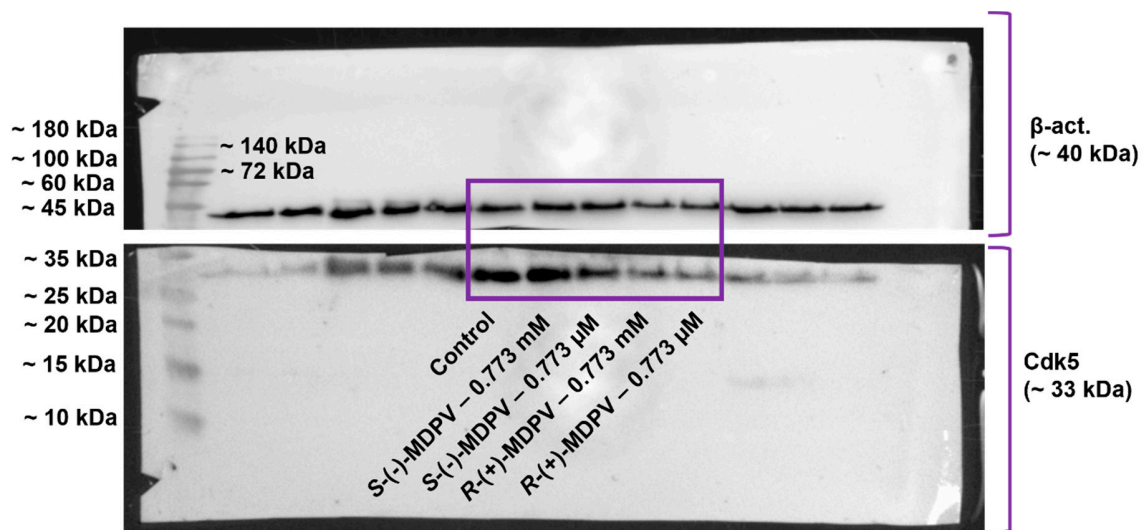

**Figure S2.** Whole western blot with molecular weight markers for the results of Cdk5 (Figure 9B).

**Table S1.** Densitometry readings of BDNF, Cdk5 and β-actin and corresponding ratios.

|                       | BDNF    | β-act.   | BDNF/<br>β-act. | Cdk5    | β-act.   | Cdk5/<br>β-act. |
|-----------------------|---------|----------|-----------------|---------|----------|-----------------|
| Control               | 7114721 | 10102257 | 0.754           | 6665473 | 10697999 | 0.732           |
| S-(-)-MDPV – 0.773 mM | 3812395 | 7248132  | 0.600           | 5794052 | 8519039  | 0.640           |
| S-(-)-MDPV – 0.773 μM | 7222052 | 10555884 | 0.704           | 6455587 | 13709127 | 0.512           |
| R-(+)-MDPV – 0.773 mM | 3815989 | 7868410  | 0.558           | 3666241 | 8042054  | 0.624           |
| R-(+)-MDPV – 0.773 μM | 6552368 | 9517177  | 0.696           | 5232219 | 10429950 | 0.615           |
